# Supplementary material
Source: PubMed Central journal article supplement (PMC152997)

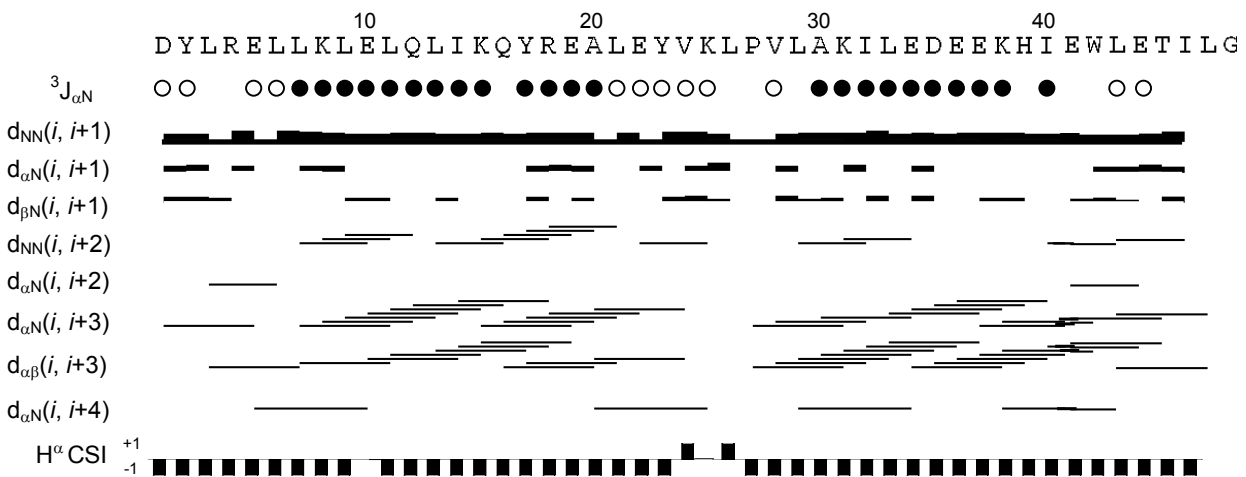

Supplement: pnas_0730771100_6.pdf [file pnas_0730771100_6.pdf]
